# Supplementary material
Source: PubMed Central journal article supplement (PMC1283957)
Supplement: 7600859s1.pdf [file 7600859s1.pdf]

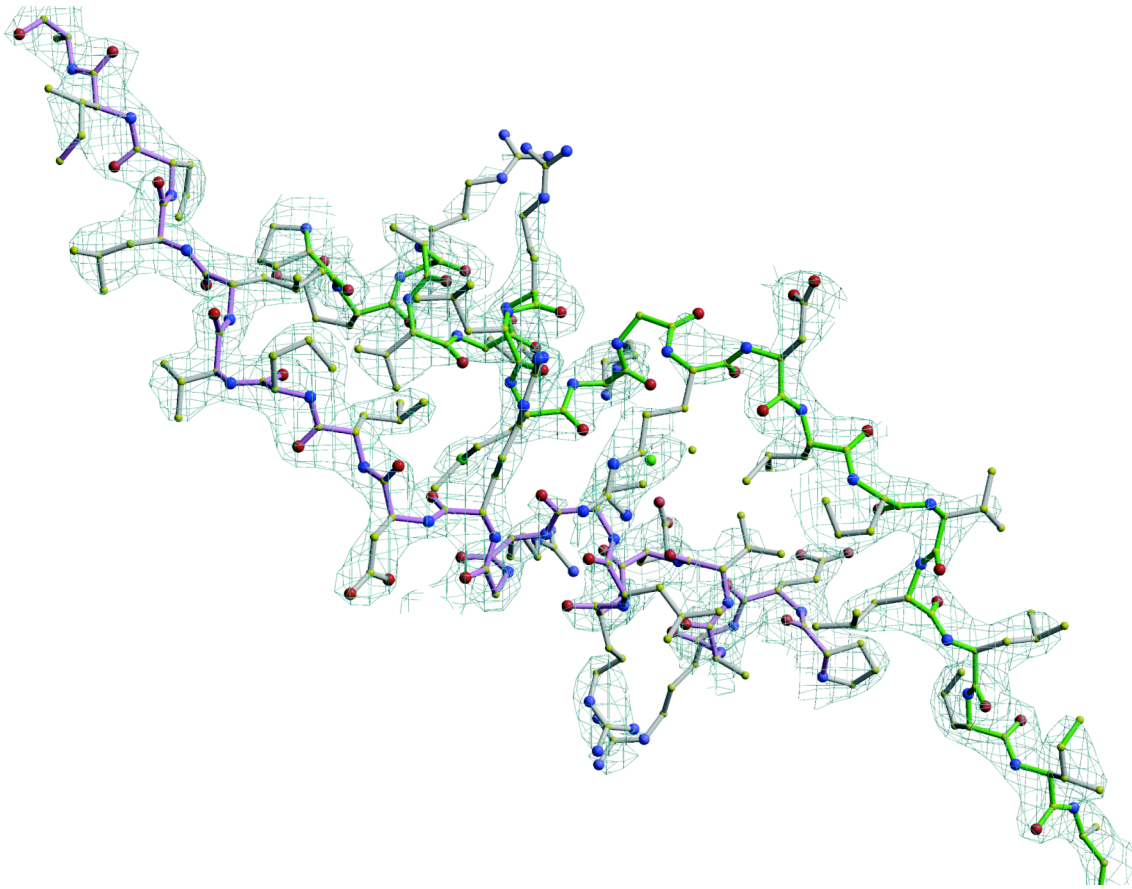

**Cross region of subunit F (extended subunit F) (supplementary Figure 1).**

Close-up of Figure 2B is shown with electron density map and side residues.  $2F_o - F_c$  electron density map (from residue Pro-60 to Asp-80) is shown at a contour level of  $1.5 \sigma$ .
