# Supplementary material
Source: PubMed Central journal article supplement (PMC1283957)
Supplement: 7600859s3.pdf [file 7600859s3.pdf]

## References

Bateman A, Coin L, Durbin R, Finn RD, Hollich V, Griffiths-Jones S, Khanna A, Marshall M, Moxon S, Sonnhammer EL, Studholme DJ, Yeats C, Eddy SR (2004) The Pfam protein families database. *Nucleic Acids Res* **32**: D138-141

Rice P, Longden I, Bleasby A (2000) EMBOSS: the European Molecular Biology Open Software Suite. *Trends Genet* **16**: 276-277
